# Supplementary material
Source: publisher figshare collection journal article supplement (https://geolsoc.figshare.com/articles/dataset/_/3454316)
Supplement: Supplementary file 1 [file 1]

Table 2. Pb/Pb data and ages obtained by laser ablation inductively-coupled plasma quadrupole mass spectrometer.

|                                       | RAW COUNTS        |                   | RATIOS                                |                                       | Age  |     |
|---------------------------------------|-------------------|-------------------|---------------------------------------|---------------------------------------|------|-----|
|                                       | <sup>206</sup> Pb | <sup>207</sup> Pb | <sup>207</sup> Pb/ <sup>206</sup> Pbr | <sup>207</sup> Pb/ <sup>206</sup> Pbc | Ma   | Err |
| <b>Nuussuaq Augen Gneiss (464927)</b> |                   |                   |                                       |                                       |      |     |
| 1                                     | 36724             | 8416              | 0.22916                               | 0.22168                               | 2993 | 2.7 |
| 2                                     | 39724             | 8995              | 0.22644                               | 0.21870                               | 2971 | 2.4 |
| 3                                     | 29203             | 6347              | 0.21734                               | 0.21064                               | 2910 | 3.8 |
| 4                                     | 59366             | 13333             | 0.22458                               | 0.21463                               | 2941 | 3.3 |
| 5                                     | 44407             | 9942              | 0.22388                               | 0.21569                               | 2949 | 3.0 |
| 6                                     | 33493             | 7679              | 0.22927                               | 0.22209                               | 2996 | 4.3 |
| 7                                     | 28084             | 6295              | 0.22414                               | 0.21743                               | 2962 | 5.0 |
| 8                                     | 64170             | 14133             | 0.22024                               | 0.20982                               | 2904 | 4.0 |
| 9                                     | 32713             | 7274              | 0.22237                               | 0.21535                               | 2946 | 4.4 |
| 10                                    | 29203             | 6383              | 0.21858                               | 0.21186                               | 2920 | 4.2 |
| 11                                    | 31593             | 6908              | 0.21867                               | 0.21178                               | 2919 | 5.0 |
| 12                                    | 109592            | 24525             | 0.22378                               | 0.20759                               | 2887 | 3.2 |
| 13                                    | 39594             | 8899              | 0.22476                               | 0.21706                               | 2959 | 4.0 |
| 14                                    | 34710             | 7648              | 0.22034                               | 0.21318                               | 2930 | 5.3 |
| 15                                    | 59668             | 13460             | 0.22559                               | 0.21557                               | 2948 | 2.9 |
| 16                                    | 31363             | 6803              | 0.21692                               | 0.21007                               | 2906 | 4.8 |
| 17                                    | 22858             | 5440              | 0.23800                               | 0.23268                               | 3071 | 5.4 |
| 18                                    | 34661             | 7710              | 0.22246                               | 0.21527                               | 2946 | 4.8 |
| 19                                    | 19512             | 4325              | 0.22167                               | 0.21727                               | 2961 | 6.8 |
| 20                                    | 22394             | 4939              | 0.22057                               | 0.21567                               | 2949 | 5.3 |
| 21                                    | 62509             | 13918             | 0.22266                               | 0.21237                               | 2924 | 3.9 |
| 22                                    | 25645             | 5660              | 0.22069                               | 0.21414                               | 2937 | 4.4 |
| 23                                    | 43502             | 9728              | 0.22362                               | 0.21553                               | 2948 | 5.2 |
| 24                                    | 31086             | 6989              | 0.22484                               | 0.21791                               | 2965 | 5.1 |
| 25                                    | 49056             | 10896             | 0.22211                               | 0.21343                               | 2932 | 5.0 |

| RAW COUNTS                             |                   |        | RATIOS                                |                                       | Age  |      |
|----------------------------------------|-------------------|--------|---------------------------------------|---------------------------------------|------|------|
| <sup>206</sup> Pb                      | <sup>207</sup> Pb |        | <sup>207</sup> Pb/ <sup>206</sup> Pbr | <sup>207</sup> Pb/ <sup>206</sup> Pbc | Ma   | Err  |
| <b>Anap Nuna Group (south; 464933)</b> |                   |        |                                       |                                       |      |      |
| 1                                      | 180264            | 30838  | 0.17107                               | 0.18783                               | 2723 | 4.0  |
| 2                                      | 227972            | 37062  | 0.16257                               | 0.17714                               | 2626 | 4.0  |
| 3                                      | 325677            | 38352  | 0.11776                               | 0.12808                               | 2071 | 4.0  |
| 4                                      | 600711            | 112088 | 0.18659                               | 0.18644                               | 2711 | 4.0  |
| 5                                      | 593261            | 107420 | 0.18107                               | 0.18091                               | 2662 | 4.0  |
| 6                                      | 623880            | 101920 | 0.16336                               | 0.16321                               | 2490 | 4.0  |
| 7                                      | 155762            | 24977  | 0.16036                               | 0.17726                               | 2627 | 4.0  |
| 8                                      | 67258             | 10245  | 0.15232                               | 0.17017                               | 2559 | 4.0  |
| 9                                      | 107510            | 19569  | 0.18202                               | 0.20235                               | 2845 | 4.0  |
| 10                                     | 179270            | 28327  | 0.15801                               | 0.17400                               | 2597 | 4.0  |
| 11                                     | 115714            | 20672  | 0.17865                               | 0.19839                               | 2813 | 4.0  |
| 12                                     | 181993            | 28987  | 0.15928                               | 0.17526                               | 2608 | 4.0  |
| 13                                     | 144506            | 33792  | 0.23385                               | 0.25590                               | 3220 | 4.0  |
| 14                                     | 128123            | 19912  | 0.15542                               | 0.17269                               | 2584 | 4.0  |
| 15                                     | 160756            | 23426  | 0.14573                               | 0.16134                               | 2470 | 4.0  |
| 16                                     | 172107            | 27232  | 0.15823                               | 0.17446                               | 2601 | 4.0  |
| 17                                     | 237671            | 26181  | 0.11016                               | 0.11029                               | 1804 | 3.0  |
| 18                                     | 432163            | 51421  | 0.11899                               | 0.11664                               | 1905 | 9.1  |
| 19                                     | 289400            | 56210  | 0.19423                               | 0.19223                               | 2761 | 15.0 |
| 20                                     | 118158            | 19517  | 0.16517                               | 0.16752                               | 2533 | 5.6  |
| 21                                     | 25854             | 4030   | 0.15588                               | 0.16258                               | 2483 | 6.3  |
| 22                                     | 43026             | 5412   | 0.12579                               | 0.13187                               | 2123 | 6.9  |
| 23                                     | 315109            | 44688  | 0.14182                               | 0.14031                               | 2231 | 7.7  |
| 24                                     | 194246            | 26548  | 0.13667                               | 0.13719                               | 2192 | 10.0 |
| 25                                     | 111220            | 16406  | 0.14751                               | 0.15033                               | 2350 | 10.1 |
| 26                                     | 320020            | 52861  | 0.16518                               | 0.16319                               | 2489 | 4.4  |
| 27                                     | 3266              | 453    | 0.13860                               | 0.13155                               | 2119 | 14.5 |
| 28                                     | 96943             | 14454  | 0.14910                               | 0.15262                               | 2375 | 4.2  |
| 29                                     | 561332            | 82712  | 0.14735                               | 0.14291                               | 2263 | 2.8  |
| 30                                     | 685205            | 127176 | 0.18560                               | 0.17864                               | 2640 | 9.9  |
| 31                                     | 667548            | 122245 | 0.18313                               | 0.17644                               | 2620 | 8.4  |
| 32                                     | 496889            | 58348  | 0.11743                               | 0.11450                               | 1872 | 6.3  |
| 33                                     | 493398            | 82795  | 0.16781                               | 0.16355                               | 2493 | 8.3  |
| 34                                     | 171394            | 41798  | 0.24387                               | 0.24371                               | 3144 | 9.9  |
| 35                                     | 446784            | 54348  | 0.12164                               | 0.11908                               | 1942 | 11.8 |
| 36                                     | 390075            | 55950  | 0.14343                               | 0.14096                               | 2239 | 2.3  |
| 37                                     | 1024489           | 173545 | 0.16940                               | 0.15954                               | 2451 | 6.9  |
| 38                                     | 495349            | 92047  | 0.18582                               | 0.18110                               | 2663 | 4.4  |
| 39                                     | 683695            | 117414 | 0.17173                               | 0.16524                               | 2510 | 5.0  |
| 40                                     | 704100            | 113279 | 0.16089                               | 0.15455                               | 2397 | 6.8  |
| 41                                     | 329714            | 40915  | 0.12409                               | 0.12274                               | 1996 | 4.7  |
| 42                                     | 373725            | 47120  | 0.12608                               | 0.12418                               | 2017 | 5.7  |
| 43                                     | 6854              | 961    | 0.14017                               | 0.13824                               | 2205 | 26.3 |
| 44                                     | 286340            | 35130  | 0.12269                               | 0.12192                               | 1984 | 5.6  |

|    |         |        |         |         |      |     |
|----|---------|--------|---------|---------|------|-----|
| 45 | 1165085 | 269488 | 0.23130 | 0.21703 | 2959 | 5.0 |
| 46 | 460085  | 55590  | 0.12082 | 0.11815 | 1929 | 4.1 |
| 47 | 141824  | 22457  | 0.15834 | 0.16283 | 2485 | 6.0 |
| 48 | 89163   | 10988  | 0.12324 | 0.13015 | 2100 | 4.0 |
| 49 | 10790   | 1325   | 0.12277 | 0.12527 | 2033 | 8.4 |
| 50 | 39517   | 6016   | 0.15223 | 0.16156 | 2472 | 6.6 |
| 51 | 12085   | 1947   | 0.16108 | 0.16525 | 2510 | 7.7 |
| 52 | 11606   | 1463   | 0.12610 | 0.12910 | 2086 | 7.5 |
| 53 | 32435   | 3763   | 0.11603 | 0.12309 | 2001 | 5.0 |
| 54 | 53760   | 9082   | 0.16894 | 0.17872 | 2641 | 4.1 |
| 55 | 38303   | 6244   | 0.16302 | 0.17282 | 2585 | 5.3 |
| 56 | 92701   | 11435  | 0.12335 | 0.13007 | 2099 | 4.1 |
| 57 | 152416  | 27996  | 0.18368 | 0.18762 | 2721 | 3.7 |
| 58 | 185859  | 34003  | 0.18295 | 0.18601 | 2707 | 4.0 |
| 59 | 45240   | 6488   | 0.14342 | 0.15243 | 2373 | 5.0 |
| 60 | 21650   | 2915   | 0.13466 | 0.14127 | 2243 | 6.2 |
| 61 | 60543   | 10200  | 0.16847 | 0.17780 | 2632 | 3.5 |
| 62 | 39267   | 6005   | 0.15293 | 0.16229 | 2480 | 4.9 |
| 63 | 72466   | 8601   | 0.11869 | 0.12621 | 2046 | 4.5 |
| 64 | 172390  | 21620  | 0.12541 | 0.12920 | 2087 | 4.2 |
| 65 | 88208   | 13525  | 0.15333 | 0.16095 | 2466 | 2.9 |
| 66 | 373881  | 64285  | 0.17194 | 0.17271 | 2584 | 1.9 |
| 67 | 227122  | 28116  | 0.12379 | 0.12647 | 2049 | 3.2 |
| 68 | 206925  | 25358  | 0.12255 | 0.12559 | 2037 | 4.1 |
| 69 | 252016  | 29866  | 0.11851 | 0.12086 | 1969 | 2.3 |
| 70 | 397207  | 63471  | 0.15979 | 0.16048 | 2461 | 1.5 |
| 71 | 173882  | 26094  | 0.15007 | 0.15364 | 2387 | 1.9 |
| 72 | 111598  | 19349  | 0.17338 | 0.17913 | 2645 | 4.9 |
| 73 | 125205  | 22696  | 0.18127 | 0.18626 | 2709 | 3.6 |
| 74 | 22070   | 2714   | 0.12297 | 0.12912 | 2086 | 6.0 |
| 75 | 57317   | 11030  | 0.19244 | 0.20230 | 2845 | 6.1 |
| 76 | 82656   | 12652  | 0.15307 | 0.16123 | 2469 | 4.5 |

| RAW COUNTS                             |                   |        | RATIOS                                |                                       | Age  |      |
|----------------------------------------|-------------------|--------|---------------------------------------|---------------------------------------|------|------|
| <sup>206</sup> Pb                      | <sup>207</sup> Pb |        | <sup>207</sup> Pb/ <sup>206</sup> Pbr | <sup>207</sup> Pb/ <sup>206</sup> Pbc | Ma   | Err  |
| <b>Anap Nuna Group (north; 464455)</b> |                   |        |                                       |                                       |      |      |
| 1                                      | 123294            | 21846  | 0.17718                               | 0.19653                               | 2798 | 4.0  |
| 2                                      | 230769            | 36728  | 0.15915                               | 0.17348                               | 2590 | 4.0  |
| 3                                      | 231950            | 36842  | 0.15884                               | 0.17311                               | 2588 | 4.0  |
| 4                                      | 382884            | 62031  | 0.16201                               | 0.16176                               | 2474 | 4.0  |
| 5                                      | 269112            | 38779  | 0.14410                               | 0.15666                               | 2420 | 4.0  |
| 6                                      | 99379             | 17233  | 0.17341                               | 0.19316                               | 2769 | 4.0  |
| 7                                      | 124724            | 24162  | 0.19372                               | 0.21437                               | 2939 | 4.0  |
| 8                                      | 66312             | 11586  | 0.17472                               | 0.19524                               | 2787 | 4.0  |
| 9                                      | 191710            | 22254  | 0.11608                               | 0.12865                               | 2079 | 4.0  |
| 10                                     | 139791            | 15808  | 0.11308                               | 0.12604                               | 2043 | 4.0  |
| 11                                     | 94432             | 14241  | 0.15081                               | 0.16831                               | 2541 | 4.0  |
| 12                                     | 204826            | 30251  | 0.14769                               | 0.16226                               | 2479 | 4.0  |
| 13                                     | 122110            | 13392  | 0.10967                               | 0.12240                               | 1991 | 4.0  |
| 14                                     | 560130            | 92581  | 0.16528                               | 0.16512                               | 2509 | 4.0  |
| 15                                     | 129925            | 22838  | 0.17578                               | 0.19477                               | 2783 | 4.0  |
| 16                                     | 87395             | 9725   | 0.11127                               | 0.11806                               | 1927 | 4.3  |
| 17                                     | 290452            | 39401  | 0.13565                               | 0.13459                               | 2159 | 5.2  |
| 18                                     | 285697            | 38482  | 0.13469                               | 0.13372                               | 2147 | 4.9  |
| 19                                     | 280466            | 37063  | 0.13215                               | 0.13129                               | 2115 | 4.3  |
| 20                                     | 269332            | 31902  | 0.11845                               | 0.11798                               | 1926 | 2.7  |
| 21                                     | 166407            | 21508  | 0.12925                               | 0.13048                               | 2104 | 4.6  |
| 22                                     | 171152            | 21596  | 0.12618                               | 0.12734                               | 2062 | 2.7  |
| 23                                     | 198950            | 36577  | 0.18385                               | 0.18367                               | 2686 | 3.9  |
| 24                                     | 522118            | 62552  | 0.11980                               | 0.11658                               | 1904 | 4.1  |
| 25                                     | 466548            | 68032  | 0.14582                               | 0.14243                               | 2257 | 3.4  |
| 26                                     | 173266            | 32068  | 0.18508                               | 0.18548                               | 2703 | 4.0  |
| 27                                     | 676010            | 81301  | 0.12027                               | 0.11569                               | 1891 | 1.7  |
| 28                                     | 400225            | 55388  | 0.13839                               | 0.13592                               | 2176 | 2.9  |
| 29                                     | 189237            | 22522  | 0.11901                               | 0.11987                               | 1954 | 3.9  |
| 30                                     | 134765            | 27213  | 0.20193                               | 0.20329                               | 2853 | 3.0  |
| 31                                     | 398678            | 46508  | 0.11666                               | 0.11471                               | 1875 | 2.1  |
| 32                                     | 418411            | 49361  | 0.11797                               | 0.11579                               | 1892 | 4.8  |
| 33                                     | 515378            | 61879  | 0.12007                               | 0.11689                               | 1909 | 2.7  |
| 34                                     | 285028            | 54963  | 0.19283                               | 0.19093                               | 2750 | 2.9  |
| 35                                     | 413907            | 49674  | 0.12001                               | 0.11782                               | 1923 | 3.0  |
| 36                                     | 114167            | 12678  | 0.11105                               | 0.11415                               | 1866 | 3.9  |
| 37                                     | 759300            | 143887 | 0.18950                               | 0.18157                               | 2667 | 3.3  |
| 38                                     | 816845            | 99396  | 0.12168                               | 0.11591                               | 1894 | 2.1  |
| 39                                     | 99098             | 12110  | 0.12221                               | 0.12571                               | 2039 | 3.1  |
| 40                                     | 146403            | 18672  | 0.12754                               | 0.12932                               | 2089 | 8.1  |
| 41                                     | 229811            | 36548  | 0.15903                               | 0.15857                               | 2440 | 8.8  |
| 42                                     | 73020             | 12712  | 0.17409                               | 0.17903                               | 2644 | 3.0  |
| 43                                     | 248012            | 52465  | 0.21154                               | 0.21003                               | 2906 | 2.5  |
| 44                                     | 102911            | 20130  | 0.19561                               | 0.19835                               | 2813 | 11.2 |

|    |        |       |         |         |      |      |
|----|--------|-------|---------|---------|------|------|
| 45 | 82635  | 15314 | 0.18532 | 0.18938 | 2737 | 4.0  |
| 46 | 666836 | 84517 | 0.12674 | 0.12200 | 1986 | 11.3 |
| 47 | 54187  | 6758  | 0.12471 | 0.13283 | 2136 | 5.0  |
| 48 | 48883  | 5319  | 0.10880 | 0.11607 | 1897 | 5.9  |
| 49 | 50444  | 5758  | 0.11414 | 0.12172 | 1982 | 4.8  |
| 50 | 48945  | 6136  | 0.12536 | 0.13351 | 2145 | 6.6  |
| 51 | 74755  | 8405  | 0.11244 | 0.11966 | 1951 | 7.9  |
| 52 | 95810  | 11835 | 0.12353 | 0.13006 | 2099 | 3.4  |
| 53 | 68193  | 12385 | 0.18161 | 0.19019 | 2744 | 5.0  |
| 54 | 30529  | 4004  | 0.13114 | 0.13887 | 2213 | 7.7  |
| 55 | 158131 | 27408 | 0.17332 | 0.17716 | 2627 | 4.2  |
| 56 | 72732  | 12334 | 0.16959 | 0.17775 | 2632 | 6.4  |
| 57 | 33703  | 4131  | 0.12258 | 0.13009 | 2099 | 6.4  |
| 58 | 45478  | 5231  | 0.11502 | 0.12258 | 1994 | 5.1  |
| 59 | 20882  | 3720  | 0.17814 | 0.18647 | 2711 | 6.1  |
| 60 | 192436 | 23256 | 0.12085 | 0.12420 | 2017 | 5.7  |
| 61 | 272581 | 44636 | 0.16375 | 0.16554 | 2513 | 4.7  |
| 62 | 132738 | 16480 | 0.12415 | 0.12927 | 2088 | 6.3  |
| 63 | 156494 | 19855 | 0.12687 | 0.13111 | 2113 | 5.1  |
| 64 | 215335 | 25894 | 0.12025 | 0.12315 | 2002 | 4.5  |
| 65 | 80111  | 10886 | 0.13588 | 0.14344 | 2269 | 4.1  |
| 66 | 111243 | 17485 | 0.15717 | 0.16309 | 2488 | 3.4  |
| 67 | 43953  | 5251  | 0.11947 | 0.12724 | 2060 | 6.7  |
| 68 | 344384 | 59050 | 0.17146 | 0.17248 | 2582 | 3.2  |
| 69 | 75887  | 8932  | 0.11770 | 0.12507 | 2030 | 3.9  |
| 70 | 201385 | 26154 | 0.12987 | 0.13297 | 2138 | 2.8  |
| 71 | 99856  | 18668 | 0.18695 | 0.19331 | 2771 | 2.7  |
| 72 | 34024  | 4812  | 0.14142 | 0.14996 | 2345 | 5.1  |
| 73 | 191087 | 23703 | 0.12404 | 0.12739 | 2062 | 2.5  |
| 74 | 263301 | 82767 | 0.31434 | 0.31537 | 3547 | 8.1  |
| 75 | 42206  | 7600  | 0.18006 | 0.19060 | 2747 | 4.2  |
| 76 | 34930  | 5602  | 0.16036 | 0.16990 | 2557 | 3.5  |

|                                          | RAW COUNTS        |                   | RATIOS                                |                                       | Age  |      |
|------------------------------------------|-------------------|-------------------|---------------------------------------|---------------------------------------|------|------|
|                                          | <sup>206</sup> Pb | <sup>207</sup> Pb | <sup>207</sup> Pb/ <sup>206</sup> Pbr | <sup>207</sup> Pb/ <sup>206</sup> Pbc | Ma   | Err  |
| <b>Nunatarsuaq Metasediment (355603)</b> |                   |                   |                                       |                                       |      |      |
| 1                                        | 110510            | 13639             | 0.12342                               | 0.13000                               | 2098 | 3.9  |
| 2                                        | 99441             | 12968             | 0.13040                               | 0.13769                               | 2198 | 8.2  |
| 3                                        | 91509             | 12028             | 0.13144                               | 0.13905                               | 2215 | 9.5  |
| 4                                        | 89415             | 11812             | 0.13211                               | 0.13992                               | 2226 | 6.3  |
| 5                                        | 88481             | 12766             | 0.14427                               | 0.15236                               | 2373 | 8.0  |
| 6                                        | 83593             | 10854             | 0.12984                               | 0.13825                               | 2205 | 8.4  |
| 7                                        | 143191            | 15853             | 0.11071                               | 0.11578                               | 1892 | 5.1  |
| 8                                        | 77988             | 8574              | 0.10995                               | 0.11838                               | 1932 | 5.5  |
| 9                                        | 118625            | 14564             | 0.12278                               | 0.12888                               | 2083 | 8.0  |
| 10                                       | 76552             | 9506              | 0.12417                               | 0.13309                               | 2139 | 9.4  |
| 11                                       | 85532             | 11039             | 0.12907                               | 0.13731                               | 2194 | 6.5  |
| 12                                       | 98012             | 12442             | 0.12694                               | 0.13398                               | 2151 | 7.4  |
| 13                                       | 13405             | 2309              | 0.17223                               | 0.17883                               | 2642 | 11.6 |
| 14                                       | 85492             | 12511             | 0.14634                               | 0.15470                               | 2398 | 12.3 |
| 15                                       | 88353             | 9864              | 0.11164                               | 0.11959                               | 1950 | 9.2  |
| 16                                       | 87853             | 11657             | 0.13269                               | 0.14065                               | 2235 | 8.3  |
| 17                                       | 76070             | 10467             | 0.13759                               | 0.14671                               | 2308 | 11.3 |
| 18                                       | 85361             | 9976              | 0.11687                               | 0.12508                               | 2030 | 9.7  |
| 19                                       | 113175            | 14297             | 0.12633                               | 0.13272                               | 2134 | 8.0  |
| 20                                       | 116380            | 13228             | 0.11366                               | 0.11998                               | 1956 | 6.8  |
| 21                                       | 121170            | 13833             | 0.11416                               | 0.12021                               | 1959 | 6.5  |
| 22                                       | 92132             | 14478             | 0.15715                               | 0.16476                               | 2505 | 8.6  |
| 23                                       | 79163             | 11000             | 0.13895                               | 0.14776                               | 2320 | 8.1  |
| 24                                       | 109307            | 15591             | 0.14264                               | 0.14911                               | 2336 | 9.7  |
| 25                                       | 82772             | 10401             | 0.12566                               | 0.13414                               | 2153 | 9.2  |
| 26                                       | 76879             | 11591             | 0.15077                               | 0.15970                               | 2452 | 5.2  |
| 27                                       | 93829             | 11779             | 0.12554                               | 0.13304                               | 2138 | 5.8  |
| 28                                       | 117322            | 14778             | 0.12596                               | 0.13211                               | 2126 | 8.0  |
| 29                                       | 159167            | 19958             | 0.12539                               | 0.12977                               | 2095 | 6.9  |
| 30                                       | 128251            | 14795             | 0.11536                               | 0.12104                               | 1972 | 5.7  |
| 31                                       | 73023             | 8954              | 0.12263                               | 0.13172                               | 2121 | 4.5  |
| 32                                       | 117585            | 15023             | 0.12776                               | 0.13388                               | 2149 | 7.1  |
| 33                                       | 113823            | 13478             | 0.11841                               | 0.12484                               | 2026 | 5.7  |
| 34                                       | 86378             | 10290             | 0.11912                               | 0.12729                               | 2061 | 10.2 |
| 35                                       | 33209             | 4073              | 0.12266                               | 0.13204                               | 2125 | 14.4 |
| 36                                       | 53074             | 5928              | 0.11169                               | 0.12087                               | 1969 | 12.6 |
| 37                                       | 25602             | 2835              | 0.11073                               | 0.11842                               | 1932 | 9.1  |
| 38                                       | 44832             | 4952              | 0.11046                               | 0.11948                               | 1949 | 16.8 |

|                                | RAW COUNTS        |                   | RATIOS                                |                                       | Age  |      |
|--------------------------------|-------------------|-------------------|---------------------------------------|---------------------------------------|------|------|
|                                | <sup>206</sup> Pb | <sup>207</sup> Pb | <sup>207</sup> Pb/ <sup>206</sup> Pbr | <sup>207</sup> Pb/ <sup>206</sup> Pbc | Ma   | Err  |
| <b>Itilli Diorite (355629)</b> |                   |                   |                                       |                                       |      |      |
| 1                              | 484887            | 109959            | 0.22677                               | 0.22824                               | 3040 | 3.5  |
| 2                              | 106925            | 22240             | 0.20800                               | 0.21515                               | 2945 | 7.6  |
| 3                              | 78088             | 15779             | 0.20206                               | 0.21190                               | 2920 | 9.0  |
| 4                              | 43391             | 9380              | 0.21617                               | 0.23214                               | 3067 | 10.4 |
| 5                              | 46189             | 9984              | 0.21616                               | 0.23172                               | 3064 | 7.1  |
| 6                              | 53158             | 10157             | 0.19108                               | 0.20520                               | 2868 | 8.0  |
| 7                              | 76015             | 16410             | 0.21588                               | 0.22582                               | 3023 | 7.9  |
| 8                              | 106871            | 22002             | 0.20587                               | 0.21305                               | 2929 | 6.3  |
| 9                              | 111985            | 23631             | 0.21102                               | 0.21782                               | 2965 | 5.6  |
| 10                             | 167302            | 35865             | 0.21437                               | 0.21891                               | 2973 | 3.3  |
| 11                             | 215867            | 49641             | 0.22996                               | 0.23339                               | 3075 | 4.1  |
| 12                             | 155985            | 34111             | 0.21868                               | 0.22351                               | 3006 | 4.3  |
| 14                             | 67806             | 14985             | 0.22100                               | 0.23205                               | 3066 | 4.2  |
| 15                             | 121498            | 26557             | 0.21858                               | 0.22479                               | 3015 | 3.2  |
| 16                             | 90940             | 20207             | 0.22221                               | 0.23045                               | 3055 | 3.1  |
| 17                             | 24072             | 4702              | 0.19533                               | 0.20952                               | 2902 | 6.3  |
| 18                             | 76109             | 16738             | 0.21993                               | 0.22980                               | 3051 | 4.9  |
| 19                             | 69170             | 13953             | 0.20172                               | 0.21282                               | 2927 | 5.4  |
| 20                             | 39063             | 8364              | 0.21412                               | 0.23047                               | 3055 | 3.7  |
| 21                             | 84000             | 18184             | 0.21648                               | 0.22547                               | 3020 | 3.7  |
| 22                             | 79299             | 17410             | 0.21955                               | 0.22903                               | 3045 | 3.7  |
| 23                             | 65298             | 14184             | 0.21722                               | 0.22874                               | 3043 | 4.4  |
| 24                             | 52055             | 11267             | 0.21645                               | 0.23087                               | 3058 | 4.7  |
| 25                             | 85789             | 18639             | 0.21727                               | 0.22606                               | 3024 | 3.8  |

## NOTES

- 1 Raw counts before any data filtering or correction for detector non-linearity.
- 2  $^{207}\text{Pb}/^{206}\text{Pbr}$  = ratio of raw counts before data filtering or correction for detector non-linearity.
- 3  $^{207}\text{Pb}/^{206}\text{Pbc}$  = ratios after 4 sigma and 2 sigma outlier filters and corrected for detector non-linearity.
- 4 First 15 ratios of samples 464933 and 464455 have errors set to reproducibility of standards with similar isotopic ratios and Pb concentration. The remainder have errors calculated as described in Appendix 2.
- 5 err = error expressed at 2 sigma level calculated as outlined in Appendix 2.
