# Supplementary material
Source: publisher figshare collection journal article supplement (https://geolsoc.figshare.com/articles/dataset/_/3454316)
Supplement: Supplementary file 2 [file 1]

Table 1. *Thermal ionization mass spectrometry U-Pb data and ages.*

| Fraction                                  | Weight<br>[mg] | Concentration |                 | Measured                       |                                        | Corrected Atomic Ratios *              |                                       |                                       |                                        |                                       |                                       | Ages [Ma]                              |      |      |      |
|-------------------------------------------|----------------|---------------|-----------------|--------------------------------|----------------------------------------|----------------------------------------|---------------------------------------|---------------------------------------|----------------------------------------|---------------------------------------|---------------------------------------|----------------------------------------|------|------|------|
|                                           |                | U<br>[ppm]    | Pb <sup>R</sup> | Common<br>Pb <sup>T</sup> [pg] | <sup>206</sup> Pb<br><sup>204</sup> Pb | <sup>208</sup> Pb<br><sup>206</sup> Pb | <sup>206</sup> Pb<br><sup>238</sup> U | <sup>207</sup> Pb<br><sup>235</sup> U | <sup>207</sup> Pb<br><sup>206</sup> Pb | <sup>206</sup> Pb<br><sup>238</sup> U | <sup>207</sup> Pb<br><sup>235</sup> U | <sup>207</sup> Pb<br><sup>206</sup> Pb |      |      |      |
| <b>Itilli Diorite (355629)</b>            |                |               |                 |                                |                                        |                                        |                                       |                                       |                                        |                                       |                                       |                                        |      |      |      |
| Z1 3 b clr elong                          | 0.004          | 180           | 119.5           | 6                              | 4166                                   | 0.1499                                 | 0.56364                               | 170                                   | 17.1617                                | 502                                   | 0.22083                               | 30                                     | 2882 | 2944 | 2987 |
| Z2 5 clr elong                            | 0.004          | 205           | 135.4           | 7                              | 3598                                   | 0.1358                                 | 0.56643                               | 154                                   | 17.1472                                | 476                                   | 0.21956                               | 22                                     | 2893 | 2943 | 2977 |
| Z3 4 clr elong                            | 0.005          | 140           | 97.5            | 9                              | 2743                                   | 0.1673                                 | 0.58294                               | 134                                   | 17.9261                                | 388                                   | 0.22303                               | 30                                     | 2961 | 2986 | 3003 |
| Z4 1 sm clr sub                           | 0.001          | 133           | 92.5            | 1                              | 3052                                   | 0.1601                                 | 0.58255                               | 148                                   | 17.9938                                | 468                                   | 0.22402                               | 24                                     | 2959 | 2989 | 3010 |
| Z5 sm prsm clr sub                        | 0.002          | 136           | 93.6            | 3                              | 3281                                   | 0.1346                                 | 0.58724                               | 134                                   | 18.1568                                | 436                                   | 0.22425                               | 20                                     | 2978 | 2998 | 3011 |
| <b>Saqqaq Rhyolite (464926)</b>           |                |               |                 |                                |                                        |                                        |                                       |                                       |                                        |                                       |                                       |                                        |      |      |      |
| Z1 5 b clr elong                          | 0.002          | 221           | 132.6           | 8                              | 1691                                   | 0.1786                                 | 0.50848                               | 152                                   | 13.4865                                | 404                                   | 0.19236                               | 24                                     | 2650 | 2714 | 2762 |
| Z2 b clr elong                            | 0.004          | 145           | 90.6            | 5                              | 3783                                   | 0.1749                                 | 0.53038                               | 200                                   | 14.4498                                | 538                                   | 0.19759                               | 22                                     | 2743 | 2780 | 2806 |
| Z3 3 clr elong                            | 0.009          | 160           | 101.3           | 2                              | 24676                                  | 0.1605                                 | 0.54220                               | 138                                   | 14.9519                                | 400                                   | 0.20000                               | 14                                     | 2793 | 2812 | 2826 |
| Z4 5 blocky frags                         | 0.006          | 100           | 65.9            | 6                              | 3383                                   | 0.2080                                 | 0.54382                               | 102                                   | 15.0041                                | 310                                   | 0.20010                               | 14                                     | 2799 | 2816 | 2827 |
| <b>Rodebay Orthogneiss (449376)</b>       |                |               |                 |                                |                                        |                                        |                                       |                                       |                                        |                                       |                                       |                                        |      |      |      |
| Z1 4 med elong clr bge                    | 0.004          | 422           | 247.4           | 13                             | 3926                                   | 0.0904                                 | 0.53069                               | 146                                   | 14.2741                                | 406                                   | 0.19508                               | 16                                     | 2744 | 2768 | 2785 |
| Z2 1 2:1 clr sub                          | 0.001          | 175           | 102.2           | 1                              | 4775                                   | 0.0731                                 | 0.53583                               | 188                                   | 14.4034                                | 504                                   | 0.19496                               | 24                                     | 2766 | 2777 | 2784 |
| Z3 1 2:1 clr sub                          | 0.001          | 180           | 104.6           | 1                              | 4414                                   | 0.0697                                 | 0.53246                               | 152                                   | 14.3211                                | 422                                   | 0.19507                               | 22                                     | 2752 | 2771 | 2785 |
| Z4 3 v sm clr clrsls                      | 0.001          | 119           | 71.2            | 4                              | 1041                                   | 0.1050                                 | 0.53518                               | 172                                   | 14.1738                                | 498                                   | 0.19208                               | 34                                     | 2763 | 2761 | 2760 |
| <b>Unmylonitized Orthogneiss (464941)</b> |                |               |                 |                                |                                        |                                        |                                       |                                       |                                        |                                       |                                       |                                        |      |      |      |
| Z1 1 sm ellip clr                         | 0.001          | 99            | 60.0            | 2                              | 1377                                   | 0.1077                                 | 0.54113                               | 202                                   | 14.5989                                | 546                                   | 0.19567                               | 36                                     | 2788 | 2789 | 2790 |
| Z2 1 elong sub clr                        | 0.001          | 129           | 77.3            | 3                              | 2106                                   | 0.0900                                 | 0.54154                               | 176                                   | 14.6166                                | 450                                   | 0.19576                               | 36                                     | 2790 | 2791 | 2791 |
| T1 clr brn                                | 0.103          | 188           | 137.9           | 855                            | 736                                    | 0.4880                                 | 0.50944                               | 106                                   | 12.9146                                | 302                                   | 0.18386                               | 12                                     | 2654 | 2673 | 2688 |
| T2 clr yell                               | 0.079          | 41            | 25.5            | 171                            | 562                                    | 0.3769                                 | 0.47052                               | 94                                    | 11.2339                                | 258                                   | 0.17316                               | 14                                     | 2486 | 2543 | 2588 |
| <b>Mylonitized Orthogneiss (464938)</b>   |                |               |                 |                                |                                        |                                        |                                       |                                       |                                        |                                       |                                       |                                        |      |      |      |
| Z1 2 med clr anh bge                      | 0.002          | 317           | 192.7           | 2                              | 15724                                  | 0.0805                                 | 0.55175                               | 112                                   | 15.3824                                | 330                                   | 0.20220                               | 16                                     | 2832 | 2839 | 2844 |
| Z2 3 sm clr anh bge                       | 0.002          | 463           | 271.1           | 1                              | 20510                                  | 0.0483                                 | 0.54581                               | 120                                   | 15.0098                                | 322                                   | 0.19945                               | 22                                     | 2808 | 2816 | 2822 |
| Z3 1 sm anh                               | 0.001          | 204           | 121.3           | 2                              | 2563                                   | 0.0578                                 | 0.54956                               | 152                                   | 15.2105                                | 422                                   | 0.20074                               | 24                                     | 2823 | 2829 | 2832 |
| Z4 1 sm clr anh                           | 0.001          | 255           | 159.9           | 5                              | 686                                    | 0.0968                                 | 0.55973                               | 176                                   | 15.7653                                | 530                                   | 0.20428                               | 28                                     | 2866 | 2863 | 2861 |
| <b>Mylonitized Orthogneiss (464944)</b>   |                |               |                 |                                |                                        |                                        |                                       |                                       |                                        |                                       |                                       |                                        |      |      |      |
| Z1 sub euh clr yel                        | 0.001          | 894           | 513.0           | 2                              | 12658                                  | 0.0416                                 | 0.53836                               | 120                                   | 14.7108                                | 338                                   | 0.19818                               | 18                                     | 2777 | 2797 | 2811 |
| Z2 clr yel euh                            | 0.003          | 102           | 59.6            | 2                              | 5514                                   | 0.0550                                 | 0.54194                               | 396                                   | 14.9690                                | 1096                                  | 0.20033                               | 22                                     | 2792 | 2813 | 2829 |
| Z3 sub rnd clr                            | 0.001          | 218           | 125.8           | 12                             | 547                                    | 0.0509                                 | 0.53787                               | 140                                   | 14.4744                                | 420                                   | 0.19518                               | 30                                     | 2775 | 2781 | 2786 |
| Z4 drk clr euh                            | 0.003          | 132           | 76.6            | 2                              | 6144                                   | 0.0520                                 | 0.53985                               | 240                                   | 14.8176                                | 640                                   | 0.19907                               | 30                                     | 2783 | 2804 | 2819 |
| T1 brn clr                                | 0.121          | 52            | 37.3            | 257                            | 742                                    | 0.5795                                 | 0.47455                               | 90                                    | 11.3874                                | 248                                   | 0.17404                               | 12                                     | 2504 | 2555 | 2597 |
| T2 yel clr                                | 0.055          | 28            | 13.2            | 95                             | 437                                    | 0.1513                                 | 0.41936                               | 96                                    | 9.0033                                 | 232                                   | 0.15571                               | 18                                     | 2258 | 2338 | 2410 |

**Mafic Gneiss (464940)**

|                         |       |     |      |    |      |        |         |     |         |      |         |     |      |      |      |
|-------------------------|-------|-----|------|----|------|--------|---------|-----|---------|------|---------|-----|------|------|------|
| Z1 6 med anh clr clrsls | 0.013 | 169 | 96.1 | 13 | 5475 | 0.0429 | 0.53513 | 132 | 14.3334 | 362  | 0.19426 | 18  | 2763 | 2772 | 2779 |
| Z2 1 sm clr clrsls      | 0.001 | 8   | 4.3  | 5  | 64   | 0.1267 | 0.49343 | 842 | 12.8707 | 2442 | 0.18918 | 138 | 2586 | 2670 | 2735 |
| Z3 1 sm clr clrsls      | 0.001 | 65  | 37.3 | 2  | 902  | 0.0335 | 0.54046 | 184 | 14.5065 | 534  | 0.19467 | 30  | 2785 | 2783 | 2782 |

**Tonalite Orthogneiss (449375)**

|                       |       |     |       |    |       |        |         |     |         |     |         |    |      |      |      |
|-----------------------|-------|-----|-------|----|-------|--------|---------|-----|---------|-----|---------|----|------|------|------|
| Z1 7 sm-med elong clr | 0.005 | 319 | 187.5 | 10 | 5185  | 0.1674 | 0.50441 | 140 | 13.1327 | 358 | 0.18883 | 22 | 2633 | 2689 | 2732 |
| Z2 1 elong clr clrsls | 0.002 | 72  | 47.9  | 1  | 6164  | 0.2832 | 0.52624 | 182 | 13.9975 | 474 | 0.19292 | 28 | 2726 | 2750 | 2767 |
| Z3 1 elong clr clrsls | 0.001 | 51  | 33.1  | 3  | 666   | 0.2251 | 0.52845 | 310 | 13.9829 | 842 | 0.19191 | 42 | 2735 | 2749 | 2759 |
| Z4 4 v sm clr clrsls  | 0.002 | 224 | 147.9 | 1  | 12854 | 0.2793 | 0.52076 | 142 | 13.8062 | 370 | 0.19228 | 22 | 2702 | 2737 | 2762 |

**Pegmatite (449374)**

|                       |       |      |       |   |        |        |         |     |        |     |         |    |      |      |      |
|-----------------------|-------|------|-------|---|--------|--------|---------|-----|--------|-----|---------|----|------|------|------|
| Z1 brn clr tip lg     | 0.009 | 1708 | 543.1 | 3 | 128864 | 0.0145 | 0.32832 | 66  | 5.0871 | 110 | 0.11237 | 6  | 1830 | 1834 | 1838 |
| Z2 brn clr tip        | 0.005 | 1875 | 599.5 | 4 | 44519  | 0.0177 | 0.32909 | 88  | 5.0990 | 140 | 0.11238 | 8  | 1834 | 1836 | 1838 |
| Z3 2 sm clr brn rnd   | 0.004 | 1756 | 546.7 | 4 | 34046  | 0.0140 | 0.32176 | 86  | 4.9480 | 134 | 0.11153 | 10 | 1798 | 1810 | 1825 |
| Z4 clr pink ellip anh | 0.021 | 163  | 71.7  | 3 | 31558  | 0.0708 | 0.41364 | 120 | 9.3243 | 276 | 0.16349 | 14 | 2232 | 2370 | 2492 |

**Amphibolite (464947)**

|                   |       |    |      |    |      |        |         |     |        |     |         |    |      |      |      |
|-------------------|-------|----|------|----|------|--------|---------|-----|--------|-----|---------|----|------|------|------|
| Z1 8 rnd clr anh  | 0.008 | 17 | 5.5  | 19 | 163  | 0.0287 | 0.32529 | 124 | 4.9698 | 294 | 0.11080 | 48 | 1816 | 1814 | 1813 |
| Z2 16 clr rnd anh | 0.006 | 19 | 6.0  | 15 | 173  | 0.0264 | 0.32521 | 92  | 4.9758 | 202 | 0.11097 | 28 | 1815 | 1815 | 1815 |
| Z3 21 clr rnd anh | 0.031 | 32 | 10.4 | 3  | 7244 | 0.0350 | 0.33239 | 72  | 5.3425 | 120 | 0.11657 | 10 | 1850 | 1876 | 1904 |
| Z4 3 clr rnd anh  | 0.004 | 74 | 18.5 | 2  | 2188 | 0.0067 | 0.26334 | 80  | 3.7905 | 118 | 0.10440 | 14 | 1507 | 1591 | 1704 |

**Synkinematic Granite (464948)**

|                   |       |      |       |     |      |        |         |    |        |     |         |    |      |      |      |
|-------------------|-------|------|-------|-----|------|--------|---------|----|--------|-----|---------|----|------|------|------|
| Z1 brn tips       | 0.041 | 291  | 86.3  | 577 | 414  | 0.0145 | 0.30715 | 66 | 4.6172 | 126 | 0.10902 | 16 | 1727 | 1752 | 1783 |
| Z2 3 brn tips     | 0.003 | 1368 | 416.6 | 19  | 4625 | 0.0091 | 0.31654 | 72 | 4.8054 | 116 | 0.11010 | 10 | 1773 | 1786 | 1801 |
| Z3 7 brn tips     | 0.004 | 775  | 367.8 | 22  | 3699 | 0.1468 | 0.42208 | 88 | 9.3271 | 212 | 0.16027 | 10 | 2270 | 2371 | 2459 |
| Z4 2 clr bge tips | 0.001 | 1216 | 381.0 | 21  | 1189 | 0.0068 | 0.32589 | 64 | 5.0001 | 112 | 0.11128 | 12 | 1818 | 1819 | 1820 |

**Notes:**

\*Ratios corrected for fractionation, laboratory Pb blank (1 pg for zircon, 3 pg for titanite), initial common Pb calculated using Pb isotopic compositions of Stacey and Kramers (1975) and 0.25 pg U laboratory blank. Two-sigma uncertainties on isotopic ratios, calculated with a modified unpublished error propagation program written by L. Heaman, are reported after the ratios and refer to the final digits. All fractions were well abraded (Krogh, 1982). Pb<sup>R</sup> refers to radiogenic Pb; Common Pb<sup>T</sup> refers to total common Pb. Analyses reported in italics are not plotted. Sample numbers in brackets refer to the permanent catalogue system of the Geological Survey of Denmark and Greenland.

Abbreviations: anh=anhedral; b=best; bge=beige; brn=brown; clr=clear; clrsls=colourless; drk=dark; ellip=elliptical; elong=elongate; euh=euhedral; frags=fragments; lg=large (+130um); med=medium (90-130 um); prsm(s)=prisms; rnd=round; sm=small (50-90 um); sub=subhedral; v=very; yel=yellow.

Mineral Code: T= titanite; Z= zircon.
